# Supplementary material
Source: PubMed Central journal article supplement (PMC7640897)
Supplement: mmc1.pdf [file mmc1.pdf]

## Human Vault Nanoparticle Targeted Delivery of Antiretroviral Drugs to Inhibit Human Immunodeficiency Virus Type 1 Infection

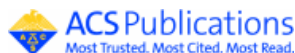

**Author:** Jennifer A. Fulcher, Kyle Tamshen, Alexander L. Wollenberg, et al

**Publication:** Bioconjugate Chemistry

**Publisher:** American Chemical Society

**Date:** Aug 1, 2019

*Copyright © 2019, American Chemical Society*

### PERMISSION/LICENSE IS GRANTED FOR YOUR ORDER AT NO CHARGE

This type of permission/license, instead of the standard Terms & Conditions, is sent to you because no fee is being charged for your order. Please note the following:

- Permission is granted for your request in both print and electronic formats, and translations.
- If figures and/or tables were requested, they may be adapted or used in part.
- Please print this page for your records and send a copy of it to your publisher/graduate school.
- Appropriate credit for the requested material should be given as follows: "Reprinted (adapted) with permission from (COMPLETE REFERENCE CITATION). Copyright (YEAR) American Chemical Society." Insert appropriate information in place of the capitalized words.
- One-time permission is granted only for the use specified in your request. No additional uses are granted (such as derivative works or other editions). For any other uses, please submit a new request.

If credit is given to another source for the material you requested, permission must be obtained from that source.

[BACK](#)

[CLOSE WINDOW](#)
