# Supplementary material
Source: PubMed Central journal article supplement (PMC7640897)
Supplement: mmc2.pdf [file mmc2.pdf]

## Virus-like glycodendrinanoparticles displaying quasi-equivalent nested polyvalency upon glycoprotein platforms potentially block viral infection

**SPRINGER NATURE**

Author: Renato Ribeiro-Viana et al

Publication: Nature Communications

Publisher: Springer Nature

Date: Dec 18, 2012

*Copyright © 2012, Springer Nature*

### Creative Commons

The request you have made is considered to be non-commercial/educational. As the article you have requested has been distributed under a Creative Commons license (Attribution-Noncommercial), you may reuse this material for non-commercial/educational purposes without obtaining additional permission from Springer Nature, providing that the author and the original source of publication are fully acknowledged (please see the article itself for the license version number). You may reuse this material without obtaining permission from Springer Nature, providing that the author and the original source of publication are fully acknowledged, as per the terms of the license. For license terms, please see <http://creativecommons.org/>

BACK

CLOSE WINDOW
